# Supplementary material
Source: HighWire-hosted journal article supplement (https://erj.ersjournals.com/content/54/1/1802256)
Supplement: inline-supplementary-material-1 [file inline-supplementary-material-1.pdf]

**Table S1: Available and missing data for each variable collected in children admitted to hospital with pneumonia\***

| Variable                                              | Available data | Not done or missing data |
|-------------------------------------------------------|----------------|--------------------------|
| <b>Gender</b>                                         | 4206           | 0                        |
| <b>Age</b>                                            | 4206           | 0                        |
| <b>Preadmission care</b>                              | 4206           | 0                        |
| Referral from other hospital                          | 4206           | 0                        |
| Diagnosis at referral                                 | 4206           | 0                        |
| Symptom duration                                      | 4116           | 90                       |
| Pre-admission antibiotic use                          | 4116           | 90                       |
| Type of antibiotic use                                | 4116           | 90                       |
| <b>Symptoms</b>                                       |                |                          |
| Cough                                                 | 4026           | 0                        |
| Fever                                                 | 4206           | 0                        |
| Runny nose                                            | 4206           | 0                        |
| Poor feeding (classification inconsistent)            | 4206           | 0                        |
| Convulsions                                           | 4206           | 0                        |
| <b>Signs</b>                                          |                |                          |
| Breath rate                                           | 4206           | 0                        |
| Temperature                                           | 4206           | 0                        |
| Weight                                                | 4206           | 0                        |
| Chest indrawing                                       | 4206           | 0                        |
| Peripheral oxygen saturation level                    | 578            | 3628                     |
| Grunting                                              | 4206           | 0                        |
| Nasal flaring                                         | 4206           | 0                        |
| Audible wheezing                                      | 4206           | 0                        |
| Wheeze on auscultation                                | 3168           | 1038                     |
| Stridor                                               | 4206           | 0                        |
| Lethargy                                              | 4206           | 0                        |
| <b>Investigation</b>                                  |                |                          |
| Chest radiograph done                                 | 4106           | 100                      |
| Full blood count (FBC) done*                          | 4102           | 104                      |
| C-Reactive protein (CRP) done*                        | 4098           | 108                      |
| CRP level (in children with a positive CRP)           | 1253           | 0                        |
| <b>Outcome</b>                                        | 4206           | 0                        |
| <b>Hospital cost</b>                                  | 4206           | 0                        |
| <b>Breastfeeding</b>                                  |                |                          |
| Any breastfeeding                                     | 4206           | 0                        |
| Months of exclusive breastfeeding**                   | 3887           | 0                        |
| Duration of breastfeeding**                           | 3887           | 0                        |
| <b>Pneumococcal vaccination***</b>                    | 4094           | 0                        |
| <b>Cigarette smoke exposure</b>                       | 4206           | 0                        |
| <b>Biomass fuel cooking</b>                           | 4206           | 0                        |
| <b>Daycare attendance</b>                             | 4206           | 0                        |
| Number of children in class (for children in daycare) | 2109           | 952                      |
| Classmate sick (for children in daycare)              | 2109           | 952                      |
| <b>Sibling ill</b> (for children who had a sibling)   | 2189           | 3                        |
| <b>Acute respiratory infections</b>                   |                |                          |
| Over last 12 months                                   | 4206           | 0                        |
| Readmission last 12 months                            | 4206           | 0                        |
| Readmission last 2 weeks                              | 4206           | 0                        |
| <b>Tuberculosis contact</b>                           | 4026           | 0                        |

\*All patients had either a CRP and/or FBC recorded; \*\*Among children with 'any breastfeeding'; \*\*\*Among children with 'any vaccination'.
